# Supplementary material for: Genotyping of B. licheniformis based on a novel multi-locus sequence typing (MLST) scheme
Source: PubMed Central journal article supplement (PMC3492095; doi:10.1186/1471-2180-12-230), 2012-10-10
Supplement: 1471-2180-12-230-S2.pdf [file 1471-2180-12-230-S2.pdf]

| Strain ID  | adk | ccpA | recF | rpoB | spo0A | sucC | MLST ST | Source                 |
|------------|-----|------|------|------|-------|------|---------|------------------------|
| NVH1032    | 4   | 5    | 4    | 4    | 5     | 5    | 8       | food, canned meat      |
| 749        | 3   | 2    | 5    | 3    | 8     | 3    | 15      | penicillinase producer |
| NVH800     | 3   | 2    | 5    | 3    | 9     | 3    | 27      | food, dates            |
| CCUG26008  | 3   | 7    | 5    | 3    | 7     | 3    | 11      | food, canned           |
| LMG7559    | 3   | 2    | 2    | 3    | 2     | 3    | 4       | food, flour            |
| LMG7633    | 3   | 2    | 2    | 3    | 2     | 3    | 4       | chincilla feces        |
| ATCC10716  | 3   | 2    | 2    | 3    | 2     | 3    | 4       | bacitracin producer    |
| ATCC8480   | 3   | 2    | 2    | 3    | 2     | 3    | 4       | unknown                |
| CCUG44767  | 3   | 7    | 2    | 3    | 2     | 3    | 14      | human blood            |
| MB1        | 3   | 2    | 2    | 3    | 2     | 8    | 21      | food                   |
| LMG6934    | 3   | 10   | 3    | 3    | 2     | 3    | 18      | soil                   |
| NVH1109    | 3   | 10   | 5    | 3    | 2     | 6    | 16      | cattle abortion        |
| NVH1077    | 3   | 4    | 3    | 3    | 2     | 4    | 6       | lung, sheep            |
| NVH1112    | 3   | 7    | 5    | 5    | 2     | 7    | 17      | cattle abortion        |
| CCUG43512A | 2   | 9    | 1    | 2    | 1     | 1    | 13      | food                   |
| NVH1078    | 2   | 1    | 1    | 2    | 1     | 1    | 26      | liver, sheep           |
| M46        | 2   | 1    | 1    | 2    | 3     | 1    | 19      | air sampler, Oslo      |
| F287       | 2   | 1    | 1    | 1    | 1     | 1    | 9       | human feces            |
| NCIB7224   | 2   | 1    | 1    | 1    | 1     | 1    | 9       | testing sterilizers    |
| NVH1110    | 2   | 1    | 1    | 1    | 1     | 1    | 9       | cattle abortion        |
| NVH1115    | 2   | 9    | 1    | 1    | 1     | 1    | 25      | cattle abortion        |
| F231       | 2   | 11   | 1    | 1    | 1     | 1    | 23      | food, profiteroles     |
| ATCC14580  | 1   | 1    | 1    | 1    | 1     | 1    | 1       | type strain            |
| BAS50      | 1   | 1    | 1    | 1    | 1     | 1    | 1       | oil reservoir          |
| ATCC9945A  | 1   | 1    | 1    | 1    | 1     | 1    | 1       | industrial strain      |
| S170       | 1   | 1    | 1    | 1    | 1     | 1    | 1       | F.Priest, unknown      |
| S172       | 1   | 1    | 1    | 1    | 1     | 1    | 1       | F.Priest, unknown      |
| NVH622     | 1   | 1    | 1    | 1    | 1     | 1    | 1       | unknown                |
| Koskio51   | 2   | 3    | 1    | 1    | 1     | 2    | 24      | mastitic milk, Finland |
| Koskio52   | 2   | 3    | 1    | 1    | 1     | 2    | 24      | mastitic milk, Finland |
| CCUG41412  | 2   | 1    | 1    | 1    | 1     | 2    | 3       | food, butter           |
| F5520      | 2   | 1    | 1    | 1    | 1     | 2    | 3       | food, rice             |
| LMG17661   | 2   | 1    | 1    | 1    | 1     | 2    | 3       | food, cheese           |
| M3         | 2   | 1    | 1    | 1    | 1     | 2    | 3       | air sampler, Oslo      |
| NVH1023    | 2   | 1    | 1    | 1    | 1     | 2    | 3       | food, canned meat      |
| NVH1111    | 2   | 1    | 1    | 1    | 1     | 2    | 3       | cattle abortion        |
| NVH1113    | 2   | 1    | 1    | 1    | 1     | 2    | 3       | cattle abortion        |
| CCUG43486  | 2   | 8    | 1    | 1    | 1     | 2    | 12      | water well             |
| F2943      | 2   | 1    | 1    | 1    | 1     | 9    | 22      | food, sandwich         |
| LMG17659   | 2   | 1    | 1    | 2    | 4     | 2    | 7       | horse, blood stream    |
| LMG7558    | 2   | 1    | 1    | 2    | 4     | 2    | 7       | food, milk             |
| NCTC962    | 2   | 1    | 1    | 2    | 4     | 2    | 7       | food, ropy bread       |
| NCTC6346   | 2   | 1    | 1    | 2    | 4     | 2    | 7       | penicillinase producer |
| NVH1090    | 2   | 1    | 1    | 2    | 4     | 2    | 7       | unknown                |
| 553/1      | 2   | 1    | 1    | 2    | 1     | 2    | 2       | food, infant           |

|           |   |   |   |   |   |   |    |                   |
|-----------|---|---|---|---|---|---|----|-------------------|
| CCUG31354 | 2 | 1 | 1 | 2 | 1 | 2 | 2  | water well        |
| M23       | 2 | 1 | 1 | 2 | 1 | 2 | 2  | air sampler, Oslo |
| NVH1079   | 2 | 1 | 1 | 2 | 1 | 2 | 2  | liver, sheep      |
| NVH1123   | 2 | 1 | 1 | 2 | 1 | 2 | 2  | cattle abortion   |
| M55       | 2 | 1 | 1 | 2 | 3 | 2 | 20 | air sampler, Oslo |
| B317      | 2 | 3 | 1 | 1 | 3 | 1 | 5  | ovine abortion    |
| B357      | 2 | 3 | 1 | 1 | 3 | 1 | 5  | water well        |
| B316      | 2 | 6 | 1 | 1 | 6 | 1 | 10 | bovine abortion   |
