# Supplementary material for: Genotyping of B. licheniformis based on a novel multi-locus sequence typing (MLST) scheme
Source: PubMed Central journal article supplement (PMC3492095; doi:10.1186/1471-2180-12-230), 2012-10-10

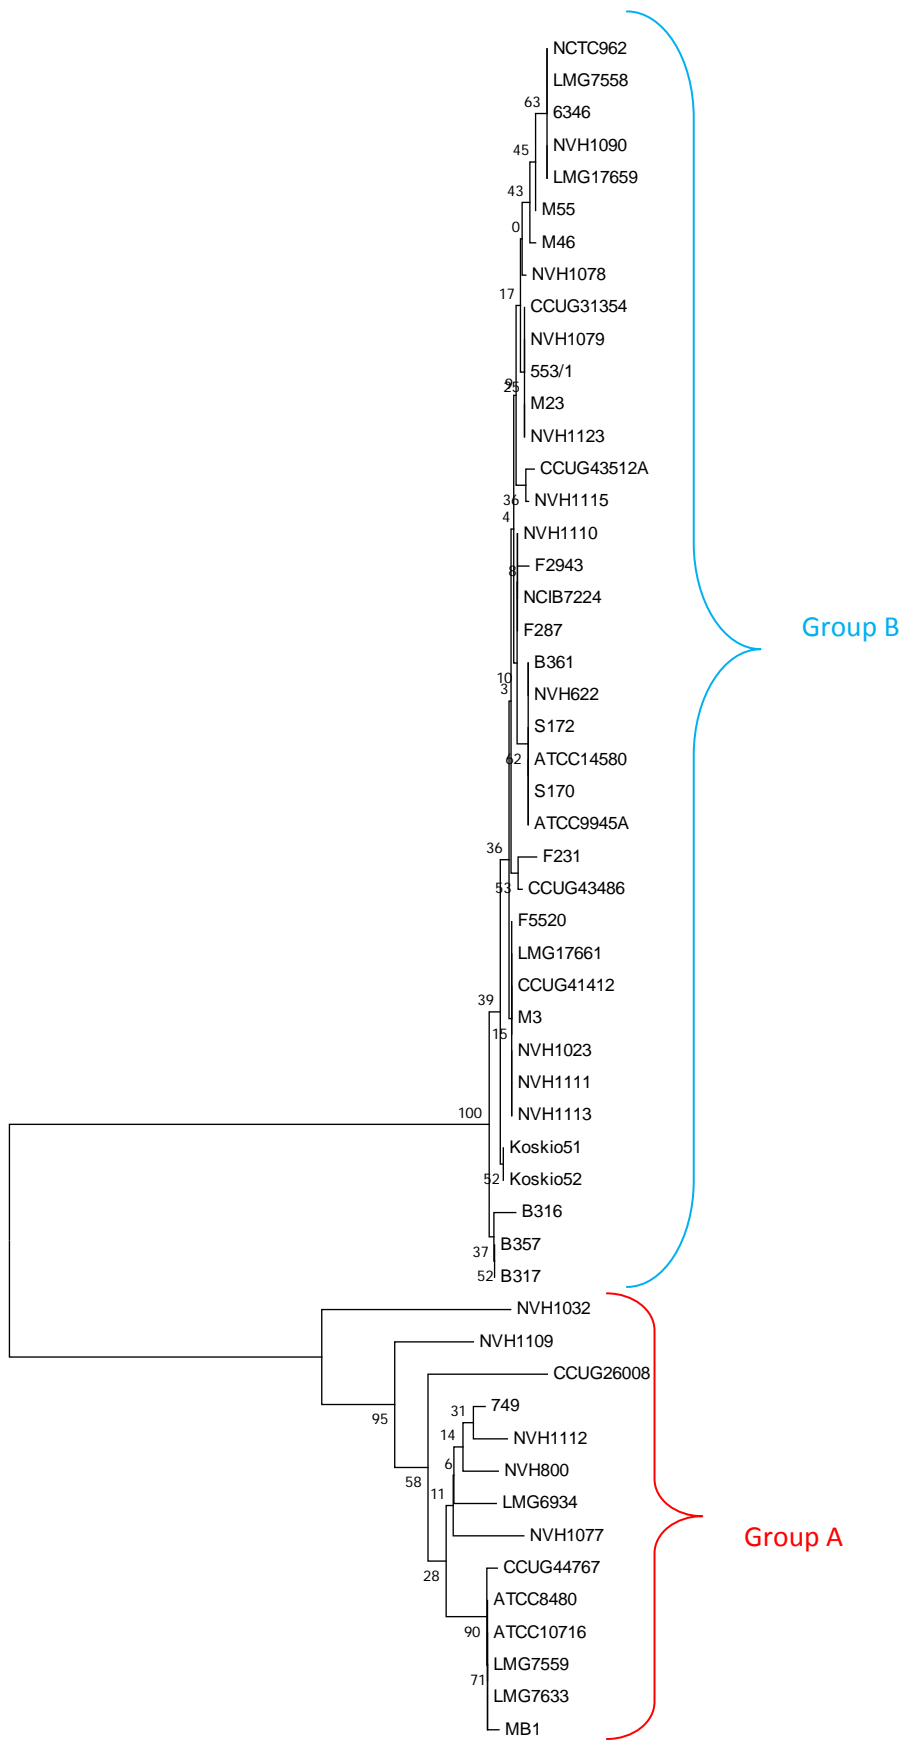

Supplement: 1471-2180-12-230-S3.pdf [file 1471-2180-12-230-S3.pdf]
